# Supplementary material for: Phylogenetic analysis of viruses in Tuscan Vitis vinifera sylvestris (Gmeli) Hegi
Source: PubMed Central journal article supplement (PMC6051638; doi:10.1371/journal.pone.0200875), 2018-07-18
Supplement: pone.0200875.s003.pdf [file pone.0200875.s003.pdf]

1 **S3 File**

2

3 >GRSPaV-32

4 TGAAGGCTTTAGGGGTTAGCCAAAAAGTTGATGAAATTGATTACAGTTGTTGAAAGAG  
5 TTAAATGGCAAGTCAAATTGGAAAGTTGCCTGGCGAGTCAAATGAAGCATATGAAGCC  
6 AGACTTAAGGCTTTAGAGTTAGCAAGGGCTCAAAGGGCTCCGGAAGTTTCCAGCCAAC  
7 CTCCCACACTTAGTGGCATTCTTGCCAAAAGGAAAAGAGTGATTGAGAATGCACTCTC  
8 GAAGACAGTGGATATGCGTGAAGTTTTAAGGCATGAATCTGTTGTACTCTCCCCAAAT  
9 GTGATGGATGAGGGAGCAATAGATGAGCTAATTCGTGCCTTTGGGGAGTCAGGCATAG  
10 CTGAAAATGCGCAGTTCGATGTTGCAATAGACATTGCCCGCCACTGTTCTGATGTGGGA  
11 AGTTCTCAGAGGTCAACCCTAATTGGTAAGAGCCCCTTCTGCGAGTTAAATCGGTCTGA  
12 AATTGCTGGAATTATAAGGGAGGTAACCACACTGCGCAGATTTTGCATGTACTACGCA  
13 AAAATCGTGTGGAACATTCATTTGGAGACGGGAATACCACCAGCTAATTGGGCCAAGA  
14 AGGATTTAATGAGAATGAAAAGTTTGCAGCCTTTGACTTCTTCCTTGGAGTCACAGATG  
15 AAAGCGCGCTTGAACCTAAGGGTGGTGTCAAGAGAGCTCCAACAAAGGCAGAGATGG  
16 TCGCTAATATTGCCTCTTTTGAGGTCAAAGTGCTCAGACAGACTATGGCTGAAGGAAA  
17 GCGGAGCTCCAATCTTGGAGAAATTAGTGGTGGAAACGGCTGGGGCGCTTATTAACAAC  
18 CCCTTTGCAAACGTTACGCATGAATGAGGTTGATAGTGGAAGCAATGCTCCTTCATCCA  
19 AATAATCACCCGATTTCAAGGCTGGGT

20

21 >GRSPAV-50

22 GAAAAGAGTGATTGAGAATGCACTCTCAAAGGTAGACATGCGTGAAGTTTTAAGGCAT  
23 GAATCTGTTGTGCTTTCCCCAAAAGTGATGGATGAGGGACCATCTATGAGCTGATTCGC  
24 GCCTTTGGGGAGTCAGGCATAGCCGAGAATGCGCAAATTGATGTTGCAATAGACATTG  
25 CCCGCCACTGTTCTGATGTAGGAAGTTCTCAATGGTCTACCCTATGTGGTAAAAGCCCC  
26 TTCTGCGAGTTTAATCGGTCTGAAATTGCTGGAATTATAAGGGAGGTACCCACGCTGCG  
27 TTCAACTTTGCTGTACTACGCAATAATTGTGTGGTACATCCATTTGGAGACGGGGAATA  
28 CCACCGCCTAATTGGGCCATGAATGGATTTAATGAGAATGAAAAGGTTGATTCCTTTG  
29 ACTTCTTCCTTGGAGTCACAGATGAGAGCGCGCTAGAACCTAAGGGTGGTGTCAAGAG  
30 AGCTCCAACAAAAGCAGAGATGGTCGCTAATATTGCCTCTTTTGAAGTCAGAGTGCTC  
31 ATACAGACTATGGCTGAAGGAAAGCGGAGATCCCATCTCGCAGAATTTAGAGGGGGG  
32 AATCGGATGGGGCGCTCATCAAC

33

34 >GLRaV-1\_18

35 ATGGCTAGCGTTATATCTCAAATGATGATGACTATAACGTCGTCCGGGGAGGAAATA  
36 TCGTTGTGCCGCGCACGCCTACTTTAAATGGTTTCGGTACATCGGCCTTCACTATACCT  
37 GCAGGTGAGGCGACTGCGTACGTTTTGAAAACACAGTACTCGAAGCCAGAAGCTGGTA  
38 CTCCCGAGGCAAATCACCTGTGATTGGTGTCTGCCAGACGAGTATGTGTTTCGTGAAA  
39 GGTCCGGGAGGTTATACTCTCCGTCCTTCTCGACCGTCTACGGGTCAGCGTTCGGGGGA

40 TTCTGAAGTGGCTAAGCGAGAAATGGGCGACCGGCCGCCATGGCGGCCGCGGGAATTC  
41 GATTTCTTTACCAACCCCGAGATGAATATTATCTTTGAGCCACCGAAGGATATGGAAGT  
42 TTCGGTTGTGGTGCCAACCGGACCCGGCTTGGTGACGCCGGCTGTGGCAACAGCTATA  
43 TCTACGGAATTAATAAAATTTGTGTGCTGAAGTGATGGGTAATACTGATGAGAAAAGTC  
44 TCACAGATTTCTTCTTGGCAATGTTGCAATTAATGTTGACGTTTAGCACATCACCAGAC  
45 ACTGAGAGCAAAGAAGAGTACTTCGTGAATTTGTACAGTAACGGCGAGCGAAAATTA  
46 CTTACGAGAAGGTTAAGGGCGCCGTTGTCAAAGGAGCTGAAGGCTCGACGTTTCGAAAA  
47 TCCTATGCGTCAGTATGCCAGGTTGTTCTCAGCAACGGCTGTACATTTAATATTGAATG  
48 GAAAGTTAAGGCCGAACGAGAAAGTAGCTATGCAACACGGCGTACCTAAGAGGTTTCT  
49 TCCGTATACTTTTGATTTCTGCAGACCATCTTATTCTCAATTTAGCAATGACGCCATTAG  
50 AGCATGGCAGTTGGCGGCAGAATCGGCGTTCGGGCGGAAGAGTAATGTAACAAGCTC  
51 AGTACTAAGAAACACCAGTGAGCTCAAGGTGTAG

52

53 >GVA-35

54 GATACCCTAGTTATGCCAGAGGTGTATGAGACAATAAAGAAACTTGGGTTGAGGACAA  
55 ATGGCACACTACGCCAAGAGGGTGGAGATAAGGGCGATAATAGAAGAGTTGGTGCTG  
56 GCGAAAGCCCAGCCAACCTGAAGACGCTTCCGAGAGCGGCTACGACCGAAATATGTACC  
57 TGAATACTCTCTTCGGGTACATCGCCTTGGTTCGGCACAAGCAAAAAGGCGGTCCATTAT  
58 GGAGAGGTAGATATAGTAGGTCCTAAAGCTAGCAAAAAGACTGGGATAGACCCGAGA  
59 GGAAAACCTGGTCGTATCTGAGCTAGTAGGCAGGATGCGCACACTGAGTGTGGCAGTCA  
60 GTGAGGGTCTCTGTTAAAGGAGCAACTCTGAGGCAAATGTGCGAGCCATTCGCACAGAA  
61 CGCCTATGACTTCCTCGTTCTGATGGCTGAGATGGGCACATATTCGCAGTTAGCAACTA  
62 AGATGACTAGGTCAGGCTTCAAGGAGCCACAGGTTATGTTTCGACTTTGCGTCGGGCTT  
63 AGATCTGAAAGCACTGACATTGCAAGAAGCTACTGTGATACAGGCCATGCACTCCCGT  
64 CTCTTTTCGTACGGAAGGCGCAAAGGGGGTATTCAACGCTCAGTCATCAGTCGGTGAGC  
65 AGGCTGTGCGAAATATAGATGGATGACCCATCGTTTCTCTCGGGTAGGTCCACGTTTGCT  
66 AAGCGTAGGCGCGCTAGGCGCATGAATGTGTGGTAGTGTGGTGC

67

68 >GVA-76

69 ATGGCACACTACGCCAAGAGGGTGGAGATGAGGGCGATAATAGAAGAGTTGGTGCTG  
70 GCGAAAGCCCAGCCAACCTGAAGACGCTTCAGAGAGCGGCTACGACCGAAATATGTAC  
71 CTGAATACTCTCTTCGGGTACATCGCCTTGGTTCGGCACAAGCAAAAAGGCGGTCCATT  
72 ATGGAGAGGTAGATATAGTAGGTCCTAAAGCTAGCAAGAAGACAGGGATAGACCCGA  
73 GAGGAAAACCTGGTCGTATCTGAACTAGTGGGCAGGATGCGCACACTGAGTGTGGCAGT  
74 CAGCGAGGGTCTGTCAAAGGGGCAACTCTGAGGCAAATGTGCGAGCCATTCGCACAG  
75 AACGCCTATGACTTCCTCGTTCTGATGGCAGAGATGGGCACATATTCGCAGTTAGCAAC  
76 CAAGATGACTAGGTCAGGCTTCAAGGAGCCACAGGTTATGTTTCGACTTTGCGTCGGGC  
77 TTAGATCTGAAAGCACTGACATTGCAAGAAGCTACTGTGATACAGGCCATGCACTCCC  
78 GTCTCTTTTCGTACGGAAGGCGCAAAGGGGGTATTCAACGCTCAGTCATCAGTCGGTGA  
79 GCAGGCTGTGCGAAATATAGATGGATGACCCATCGTTTCTCTCGGGTAGGTCCACGTTTG  
80 CTAAGCGTAGGCGCGCTAGGCGCATGAATGTGTGTAAGTGTGGTGC

81

82 >GLRaV-3\_42

83 TCCCCGAAAATAATTTGAGAGTTAGAGTAGGGGATGCGGCACGAGGAAAATTTAGTAA  
84 GGCGAGTTTCTTAAAGTACGTTAAGGACGGGACACAGGCGGAATTAACGGGAATCGCC  
85 GTAGTGCCCGAAAAATACGTATTCGCCACAGCAGCTTTGGCTACAGCGGCGCAGGAGC  
86 CACCTAGGCAGCCACCAGCGCAAGTGGTGGAAACCACAGGAAACCGATATAGGGGTAG  
87 TGCCGGAATCTGAGACTCTCACACCAAATAAGTTGGTTTTTCGAGAAAGATCCAGACAA  
88 GTTCTTGAAGACTATGGGCAAGGGAATAGCTTTGGACTTGACGGGAGTTACCCACAAA  
89 CCGAAAGTTATTAACGAGCCAGGGAAAGTATCAGTAGAGGTGGCAATGAAGATTAAT  
90 GCTGCATTGATGGAGCTGTGTAAGAAGGTTATGGGCGCCGATGACGCAGCAACTAAGA  
91 CAAAATTCTTCTTGTACGTGATGCAGATTGCTTGCACGTTCTTTACATCGTCTTCGACGG  
92 AGTTCAAAGAGTTTGACTACATAGAAACCGATGATGGAAAGAAGATATATGCGGTGTG  
93 GGTATATGATTGCATTAAACAAGCTGCTGCTTCGACGGGTTATGAAAACCCGGTAAGG  
94 CAGTATCTAGCGTACTTCACACCAACCTTTATCACGGCGACCCTGAATGGTAAACTAGT  
95 GATGAACGAGAAGGTTATGGCACAGCATGGAGTACCACCGAAATTCTTTCCGTACACG  
96 ATAGACTGCGTTCGTCCGACGTACGATCTGTTCAACAACGACGCAATACTAGCATGGA  
97 ATTTAGCTAGACAGCAGGCGTTTAGAAACAAGACGGTAACGGCCGATAACACCTTACA  
98 TAACGTCTTCCAACCTATTGCAAAAAGAAGTAGAA
