# Supplementary material for: Phylogenetic analysis of viruses in Tuscan Vitis vinifera sylvestris (Gmeli) Hegi
Source: PubMed Central journal article supplement (PMC6051638; doi:10.1371/journal.pone.0200875), 2018-07-18
Supplement: pone.0200875.s004.pdf [file pone.0200875.s004.pdf]

S1 Table

| Isolate    | Specie/Cultivar                   | Country  | GenBank accession number | Reference             |
|------------|-----------------------------------|----------|--------------------------|-----------------------|
| M5-G       | <i>V. vinifera</i> /Padeiro       | Portugal | AY927671                 | Nolasco et al., 2006  |
| SL48-14    | <i>V. vinifera</i> /Refosk        | Slovenia | AY927688                 | Nolasco et al., 2006  |
| Hiz3       | <i>V. labruscana</i> /Pione       | Japan    | AB331432                 | Nakaune et al., 2008  |
| GRSPaV-1   | Unknown                           | USA      | NC_001948                | Meng et al., 1998     |
| E105-G     | <i>V. vinifera</i>                | Portugal | AY927676                 | Nolasco et al., 2006  |
| BOS3       | <i>V. vinifera</i> /Cabernet F.   | Italy    | DQ364991                 | Terlizzi et al., 2010 |
| B10-1      | <i>V. vinifera</i>                | Portugal | AY927680                 | Nolasco et al., 2006  |
| Cf6        | <i>V. vinifera</i> /Cabernet F.   | Italy    | DQ364994                 | Terlizzi et al., 2010 |
| Hiz5       | <i>V. labruscana</i> /Pione       | Japan    | AB331433                 | Nakaune et al., 2008  |
| Hiz6       | <i>V. labruscana</i> /Pione       | Japan    | AB331434                 | Nakaune et al., 2008  |
| Ls3        | <i>V. vinifera</i> /Lambrusco     | Italy    | DQ364983                 | Terlizzi et al., 2010 |
| TRCV4      | <i>V. vinifera</i> /Trebiano      | Italy    | DQ364987                 | Terlizzi et al., 2010 |
| Doberdò    | <i>V. sylvestris</i>              | Italy    | DQ364988                 | Terlizzi et al., 2010 |
| M31-35     | <i>V. vinifera</i> /Loureiro      | Portugal | AY927673                 | Nolasco et al., 2006  |
| GRSPaV-SG1 | <i>Vitis rupestris</i> /St George | USA      | AY881626                 | Meng et al., 2005     |
| SL38-20    | <i>V. vinifera</i> /Refosk        | Slovenia | AY927687                 | Nolasco et al., 2006  |
| B11-2      | <i>V. vinifera</i>                | Portugal | AY927679                 | Nolasco et al., 2006  |
| D10        | <i>V. vinifera</i> /Touriga N.    | Portugal | AY927672                 | Nolasco et al., 2006  |
| BL1        | <i>V. vinifera</i> /Biancale      | Italy    | DQ364979                 | Terlizzi et al., 2010 |
| NE423PM    | <i>V. vinifera</i> /Nebbiolo      | Italy    | DQ364989                 | Terlizzi et al., 2010 |
| CNO9       | <i>V. vinifera</i> /Canino        | Italy    | DQ364981                 | Terlizzi et al., 2010 |
| BL11A      | <i>V. vinifera</i> /Biancale      | Italy    | DQ364980                 | Terlizzi et al., 2010 |
| RSS6       | <i>V. vinifera</i> /Rossiola      | Italy    | DQ364985                 | Terlizzi et al., 2010 |
| GRSPaV-BS  | Hybrid/Bertille                   | USA      | AY881627                 | Meng et al., 2005     |
| PGD2       | <i>V. vinifera</i> /Pagadebit     | Italy    | DQ364984                 | Terlizzi et al., 2010 |
| NE423TP    | <i>V. vinifera</i> /Nebbiolo      | Italy    | DQ364990                 | Terlizzi et al., 2010 |
| Hiz7       | <i>V. labruscana</i> /Pione       | Japan    | AB331435                 | Nakaune et al., 2008  |
| OB1        | <i>V. labruscana</i> /Pione       | Japan    | AB331418                 | Nakaune et al., 2008  |
| CNO15      | <i>V. vinifera</i> /Canino        | Italy    | DQ364982                 | Terlizzi et al., 2010 |
| CI29       | <i>V. vinifera</i> /Alvarinho     | Portugal | AY927678                 | Nolasco et al., 2006  |
| A8.4       | <i>V. vinifera</i>                | Portugal | AY927670                 | Nolasco et al., 2006  |
| Vs279-2    | <i>V. sylvestris</i>              | Portugal | AY927684                 | Nolasco et al., 2006  |
| M37-12     | <i>V. vinifera</i> /Borracal      | Portugal | AY927675                 | Nolasco et al., 2006  |
| TRCV1      | <i>V. vinifera</i> /Trebiano      | Italy    | DQ364986                 | Terlizzi et al., 2010 |
| M31-37     | <i>V. vinifera</i> /Loureiro      | Portugal | AY927674                 | Nolasco et al., 2006  |
| Vs284-21   | <i>V. sylvestris</i>              | Portugal | AY927685                 | Nolasco et al., 2006  |
| Vs284-23   | <i>V. sylvestris</i>              | Portugal | AY927686                 | Nolasco et al., 2006  |
