# Supplementary material for: Phylogenetic analysis of viruses in Tuscan Vitis vinifera sylvestris (Gmeli) Hegi
Source: PubMed Central journal article supplement (PMC6051638; doi:10.1371/journal.pone.0200875), 2018-07-18
Supplement: pone.0200875.s005.pdf [file pone.0200875.s005.pdf]

S2 Table

| Isolate  | Specie/Cultivar                        | Country    | GenBank accession number | Reference          |
|----------|----------------------------------------|------------|--------------------------|--------------------|
| NYLM1-7  | <i>V. vinifera</i> /Lemberger          | New York   | JF811854                 | Alabi et al., 2011 |
| NYLM1-9  | <i>V. vinifera</i> /Lemberger          | New York   | JF811855                 | Alabi et al., 2011 |
| NYLM4    | <i>V. vinifera</i> /Lemberger          | New York   | JF811857                 | Alabi et al., 2011 |
| NYLM2    | <i>V. vinifera</i> /Lemberger          | Washington | JF811826                 | Alabi et al., 2011 |
| NYLM3    | <i>V. vinifera</i> /Lemberger          | New York   | JF811832                 | Alabi et al., 2011 |
| WALM1    | <i>V. vinifera</i> /Lemberger          | Washington | JF811858                 | Alabi et al., 2011 |
| CA6 2c   | <i>V. vinifera</i> /Black Seedless     | California | JF811850                 | Alabi et al., 2011 |
| WARR1    | <i>V. vinifera</i> /Roger's Red        | Washington | JF811861                 | Alabi et al., 2011 |
| WACH2    | <i>V. vinifera</i> /Chardonnay         | Washington | JF811860                 | Alabi et al., 2011 |
| CA22 3c  | <i>V. vinifera</i> /Pinot noir         | California | JF811849                 | Alabi et al., 2011 |
| CA21 10c | <i>V. vinifera</i> /Chardonnay         | California | JF811847                 | Alabi et al., 2011 |
| CA21 5   | <i>V. vinifera</i> /Chardonnay         | California | JF811846                 | Alabi et al., 2011 |
| CA22 10  | <i>V. vinifera</i> /Pinot noir         | California | JF811848                 | Alabi et al., 2011 |
| CA6 7c   | <i>V. vinifera</i> /Black Seedless     | California | JF811851                 | Alabi et al., 2011 |
| CA7 8c   | <i>V. vinifera</i> /Negrita-S2         | California | JF811853                 | Alabi et al., 2011 |
| CA7 5    | <i>V. vinifera</i> /Negrita-S2         | California | JF811852                 | Alabi et al., 2011 |
| CA20 9   | <i>V. vinifera</i> /Audibert           | California | JF811843                 | Alabi et al., 2011 |
| CA20 2c  | <i>V. vinifera</i> /Audibert           | California | JF811844                 | Alabi et al., 2011 |
| CA11 6c  | <i>V. vinifera</i> /Zante Currat       | California | JF811834                 | Alabi et al., 2011 |
| CA17 3c  | <i>V. vinifera</i> /Cabernet Sauvignon | California | JF811838                 | Alabi et al., 2011 |
| CA16 6   | <i>V. vinifera</i> /Medaur - S1        | California | JF811836                 | Alabi et al., 2011 |
| CA16 10C | <i>V. vinifera</i> /Medaur - S1        | California | JF811837                 | Alabi et al., 2011 |
| CA20 5c  | <i>V. vinifera</i> /Audibert           | California | JF811845                 | Alabi et al., 2011 |
| CA20 4   | <i>V. vinifera</i> /Audibert           | California | JF811841                 | Alabi et al., 2011 |
| CA20 8   | <i>V. vinifera</i> /Audibert           | California | JF811842                 | Alabi et al., 2011 |
| CA18 11c | <i>V. vinifera</i> /Chardonnay         | California | JF811840                 | Alabi et al., 2011 |
| CA11 5c  | <i>V. vinifera</i> /Zante Currat       | California | JF811833                 | Alabi et al., 2011 |
| CA17 5c  | <i>V. vinifera</i> /Cabernet Sauvignon | California | JF811839                 | Alabi et al., 2011 |
