# Supplementary material for: Phylogenetic analysis of viruses in Tuscan Vitis vinifera sylvestris (Gmeli) Hegi
Source: PubMed Central journal article supplement (PMC6051638; doi:10.1371/journal.pone.0200875), 2018-07-18
Supplement: pone.0200875.s006.pdf [file pone.0200875.s006.pdf]

S3 Table

| Isolate        | Specie/Cultivar                        | Country        | GenBank accession number | Reference                |
|----------------|----------------------------------------|----------------|--------------------------|--------------------------|
| LREP100 9c     | <i>V. vinifera</i> /Emperor            | California     | KF013810                 | Alabi et al., 2014       |
| LVCH92-07 3c   | <i>V. vinifera</i> /Chardonnay         | California     | KF013819                 | Alabi et al., 2014       |
| HHCS1 17c      | <i>V. vinifera</i> /Cabernet Sauvignon | Washington     | KF013786                 | Alabi et al., 2014       |
| HHCS2 13c      | <i>V. vinifera</i> /Cabernet Sauvignon | Washington     | KF013788                 | Alabi et al., 2014       |
| LVCH94-04 4c2  | <i>V. vinifera</i> /Chardonnay         | California     | KF013816                 | Alabi et al., 2014       |
| LQ58           | Unknown                                | China          | DQ911145                 | Alabi et al., 2014       |
| LVCH92-09 2c1  | <i>V. vinifera</i> /Chardonnay         | California     | KF013824                 | Alabi et al., 2014       |
| BVPN2 8c       | <i>V. vinifera</i> / Pinot noir        | Washington     | KF013758                 | Alabi et al., 2014       |
| CBPR116 2c     | <i>V. vinifera</i> / Primitivo CL-4    | California     | KF013763                 | Alabi et al., 2014       |
| LV94-02 2c     | Unknown                                | California     | KF013812                 | Alabi et al., 2014       |
| PLVZT93-09 12c | <i>V. vinifera</i> /Zante              | California     | KF013842                 | Alabi et al., 2014       |
| PLCF95-413 c10 | <i>V. vinifera</i> /Cabernet Franc     | California     | KF013854                 | Alabi et al., 2014       |
| JP98-1         | <i>V. vinifera</i> /Shiraz             | South Africa   | AF441235                 | Goszczynski et al., 2003 |
| LVCH94-04 10c  | <i>V. vinifera</i> /Chardonnay         | California     | KF013828                 | Alabi et al., 2014       |
| LVSB91-02 11c  | <i>V. vinifera</i> / Sauvignon Blanc   | California     | KF031841                 | Alabi et al., 2014       |
| VHLM1 5c       | <i>V. vinifera</i> /Lemberger          | Washington     | KF013806                 | Alabi et al., 2014       |
| HRPCH1 10c     | <i>V. vinifera</i> /Chardonnay         | Washington     | KF013797                 | Alabi et al., 2014       |
| HHCS3 2c       | <i>V. vinifera</i> /Cabernet Sauvignon | Washington     | KF013790                 | Alabi et al., 2014       |
| HHPN1 2c2      | <i>V. vinifera</i> /Pinot noir         | Washington     | KF013793                 | Alabi et al., 2014       |
| MT25-7         | <i>V. vinifera</i> /Muller-Thurgau     | Czech Republic | EU008561                 | Kominek et al., 2008     |
| MT43-25        | <i>V. vinifera</i> /Muller-Thurgau     | Czech Republic | EU008560                 | Kominek et al., 2008     |
| CBSM119 2c     | <i>V. vinifera</i> /Sami-S1            | California     | KF013767                 | Alabi et al., 2014       |
| LVMB92-10 5c   | <i>V. vinifera</i> /Malbec             | California     | KF013836                 | Alabi et al., 2014       |
| PACF94-142 c12 | <i>V. vinifera</i> /Cabernet Franc     | California     | KF013849                 | Alabi et al., 2014       |
| A92-778        | <i>V. vinifera</i> /Shiraz             | South Africa   | AF441234                 | Goszczynski et al., 2003 |
| AY340581       | Unknown                                | Brazil         | AY340581                 | Alabi et al., 2014       |
| MSH18-1        | <i>V. vinifera</i> /Shiraz             | South Africa   | DQ855085                 | Goszczynski et al., 2007 |
| BVPN1 21c      | <i>V. vinifera</i> /Pinot noir         | Washington     | KF013755                 | Alabi et al., 2014       |
| LVCS92-06 2c1  | <i>V. vinifera</i> /Cabernet Sauvignon | California     | KF013830                 | Alabi et al., 2014       |
| CSOT2 19c      | <i>V. vinifera</i> /Cabernet Sauvignon | Washington     | KF013775                 | Alabi et al., 2014       |
