# Supplementary material for: Phylogenetic analysis of viruses in Tuscan Vitis vinifera sylvestris (Gmeli) Hegi
Source: PubMed Central journal article supplement (PMC6051638; doi:10.1371/journal.pone.0200875), 2018-07-18
Supplement: pone.0200875.s007.pdf [file pone.0200875.s007.pdf]

S4 Table

| Isolate          | Specie/Cultivar                           | Country      | GenBank accession number | Reference            |
|------------------|-------------------------------------------|--------------|--------------------------|----------------------|
| Pet-1            | <i>V. vinifera</i> /Alicante-Bouchet      | Brazil       | DQ680141                 | Maree et al., 2013   |
| Sevilhao-1       | <i>V. vinifera</i> /Sevilhao              | Portugal     | HQ401017                 | Gouveia et al., 2011 |
| G10              | <i>V. vinifera</i> /unknown               | Poland       | JN546586                 | Maree et al., 2013   |
| Pet-3            | <i>V. vinifera</i> /CG351                 | Brazil       | DQ062152                 | Maree et al., 2013   |
| 621              | <i>V. vinifera</i> /Cabernet Sauvignon    | South Africa | GQ352631                 | Jooste et al., 2010  |
| Dawanhong        | unknown                                   | China        | DQ119574                 | Maree et al., 2013   |
| CI-664           | <i>V. vinifera</i> /Merlot                | China        | EU344895                 | Engel et al., 2008   |
| ZDQ70-4          | unknown                                   | China        | JX088138                 | Maree et al., 2013   |
| 9-33             | <i>V. vinifera</i> /Merlot                | USA          | HQ130329                 | Wang et al., 2011    |
| Trincadeira-12   | <i>V. vinifera</i> /Trincadeira           | Portugal     | HQ401016                 | Gouveia et al., 2011 |
| CI-817           | <i>V. vinifera</i> /Chardonnay            | Chile        | EU344894                 | Engel et al., 2008   |
| ALTG 13-15       | unknown                                   | China        | JX088182                 | Maree et al., 2013   |
| Touriga          | <i>V. vinifera</i> /Touriga National      | Portugal     | HQ401019                 | Gouveia et al., 2011 |
| 3-14             | <i>V. vinifera</i> /Merlot                | USA          | HQ130289                 | Wang et al., 2011    |
| WHZH37-2         | unknown                                   | China        | JX088172                 | Maree et al., 2013   |
| Nasik            | <i>V. vinifera</i> /Cabernet Sauvignon    | India        | JN616386                 | Kumar et al., 2012   |
| GP18             | <i>V. vinifera</i> /Cabernet Sauvignon    | South Africa | EU259806                 | Maree et al., 2008   |
| Pet-4            | <i>V. vinifera</i> /Petite Syrah          | Brazil       | AY753208                 | Maree et al., 2013   |
| Carrega-Tinto-4b | <i>V. vinifera</i> /Carrega Tinto         | Portugal     | HQ401018                 | Gouveia et al., 2011 |
| PL-20            | <i>V. vinifera</i> /Cabernet Sauvignon    | South Africa | GQ352633                 | Jooste et al., 2010  |
| LN               | <i>V. vinifera</i> /Venus Seedless        | China        | JQ423939                 | Fei et al., 2013     |
| MP34-2           | unknown                                   | China        | JX088234                 | Maree et al., 2013   |
| 6-120            | <i>V. vinifera</i> /Merlot                | USA          | HQ130305                 | Wang et al., 2011    |
| NZ2              | <i>V. vinifera</i> /Pinot Noir            | New Zealand  | JX220899                 | Chooi et al., 2013   |
| GH11             | <i>V. vinifera</i> /Cabernet              | South Africa | JQ655295                 | Bester et al., 2012  |
| NZ1-B            | <i>V. vinifera</i> /Syrah                 | New Zealand  | JX220900                 | Chooi et al., 2013   |
| NZ1              | <i>V. vinifera</i> /Syrah                 | New Zealand  | EF508151                 | Maree et al., 2013   |
| Terrantez        | <i>V. vinifera</i> /Terrantez de Terceira | Portugal     | HQ401015                 | Gouveia et al., 2011 |
| 7-123            | <i>V. vinifera</i> /Merlot                | USA          | HQ130311                 | Wang et al., 2011    |
