# Supplementary material for: Phylogenetic analysis of viruses in Tuscan Vitis vinifera sylvestris (Gmeli) Hegi
Source: PLoS One. 2018 Jul 18;13(7):e0200875. doi: 10.1371/journal.pone.0200875 (PMC6051638; doi:10.1371/journal.pone.0200875)
Supplement: S1 File — (XLSX) [file pone.0200875.s001.xlsx]

## Sheet: Foglio1
	ELISA
	GLRaV-1					GLRaV-3					GVA					GRSPaV
	samples	OD405 well 1	OD405 well 2	Results (pos/neg)		samples	OD405 well 1	OD405 well 2	Results (pos/neg)		samples	OD405 well 1	OD405 well 2	Results (pos/neg)		samples	OD405 well 1	OD405 well 2	Results (pos/neg)
	1	0.159	0.156	neg		1	0.094	0.093	neg		1	0.199	0.202	neg		1	0.147	0.133	neg
	2	0.112	0.159	neg		2	0.101	0.102	neg		2	0.221	0.189	neg		2	0.136	0.137	neg				OD 405_well 1	OD 405_well 2
	4	0.148	0.14	neg		4	0.108	0.097	neg		4	0.18	0.185	neg		4	0.133	0.138	neg			Negative Control	0.186	0.161
	5	0.157	0.163	neg		5	0.101	0.099	neg		5	0.178	0.19	neg		5	0.148	0.145	neg			Positive Control	1.079	1.041
	6	0.142	0.15	neg		6	0.118	0.13	neg		6	0.151	0.147	neg		6	0.186	0.183	neg
	7	0.148	0.141	neg		7	0.113	0.121	neg		7	0.157	0.145	neg		7	0.182	0.173	neg
	8	0.299	0.294	neg		8	0.116	0.117	neg		8	0.144	0.179	neg		8	0.179	0.184	neg
	9	0.158	0.16	neg		9	0.121	0.134	neg		9	0.142	0.176	neg		9	0.16	0.165	neg
	10	0.525	0.672	pos		10	0.129	0.119	neg		10	0.602	0.61	pos		10	0.584	0.555	pos
	12	0.239	0.223	neg		12	0.115	0.109	neg		12	0.173	0.194	neg		12	0.147	0.151	neg
	13	0.141	0.112	neg		13	0.11	0.111	neg		13	0.17	0.172	neg		13	0.161	0.154	neg
	15	0.179	0.184	neg		15	0.11	0.108	neg		15	0.164	0.158	neg		15	0.14	0.143	neg
	17	0.153	0.15	neg		17	0.114	0.106	neg		17	0.181	0.151	neg		17	0.135	0.137	neg
	18	0.599	0.654	pos		18	0.123	0.126	neg		18	0.172	0.16	neg		18	0.541	0.534	pos
	19	0.135	0.144	neg		19	0.123	0.14	neg		19	0.175	0.158	neg		19	0.61	0.603	pos
	20	0.12	0.116	neg		20	0.127	0.118	neg		20	0.165	0.143	neg		20	0.131	0.136	neg
	21	0.143	0.101	neg		21	0.139	0.145	neg		21	0.142	0.142	neg		21	0.144	0.141	neg
	22	0.174	0.11	neg		22	0.113	0.109	neg		22	0.144	0.137	neg		22	0.143	0.149	neg
	23	0.127	0.115	neg		23	0.107	0.102	neg		23	0.175	0.173	neg		23	0.152	0.144	neg
	24	0.106	0.11	neg		24	0.119	0.114	neg		24	0.171	0.169	neg		24	0.139	0.146	neg
	26	0.123	0.112	neg		26	0.106	0.11	neg		26	0.217	0.2	neg		26	0.147	0.133	neg
	28	0.564	0.56	pos		28	0.13	0.112	neg		28	0.182	0.166	neg		28	0.137	0.136	neg
	29	0.121	0.109	neg		29	0.118	0.132	neg		29	0.167	0.174	neg		29	0.133	0.136	neg
	31	0.133	0.162	neg		31	0.125	0.132	neg		31	0.156	0.173	neg		31	0.135	0.148	neg
	32	0.114	0.1	neg		32	0.114	0.115	neg		32	0.173	0.185	neg		32	0.517	0.527	pos
	33	0.124	0.102	neg		33	0.109	0.114	neg		33	0.242	0.188	neg		33	0.589	0.578	pos
	34	0.173	0.169	neg		34	0.102	0.117	neg		34	0.196	0.21	neg		34	0.628	0.633	pos
	35	0.641	0.668	pos		35	0.119	0.112	neg		35	0.576	0.554	pos		35	0.165	0.16	neg
	36	0.105	0.104	neg		36	0.11	0.0115	neg		36	0.182	0.187	neg		36	0.19	0.202	neg
	38	0.101	0.109	neg		38	0.105	0.13	neg		38	0.179	0.158	neg		38	0.2	0.163	neg
	41	0.116	0.113	neg		41	0.132	0.133	neg		41	0.161	0.178	neg		41	0.198	0.212	neg
	42	0.097	0.092	neg		42	0.522	0.559	pos		42	0.151	0.153	neg		42	0.573	0.569	pos
	43	0.134	0.122	neg		43	0.126	0.132	neg		43	0.179	0.158	neg		43	0.131	0.135	neg
	44	0.125	0.132	neg		44	0.115	0.122	neg		44	0.183	0.173	neg		44	0.161	0.158	neg
	45	0.118	0.115	neg		45	0.127	0.114	neg		45	0.198	0.223	neg		45	0.624	0.618	pos
	46	0.122	0.124	neg		46	0.117	0.115	neg		46	0.192	0.197	neg		46	0.579	0.581	pos
	48	0.147	0.155	neg		48	0.142	0.153	neg		48	0.178	0.211	neg		48	0.514	0.532	pos
	50	0.099	0.073	neg		50	0.115	0.116	neg		50	0.19	0.183	neg		50	0.659	0.661	pos
	49	0.135	0.132	neg		49	0.114	0.109	neg		49	0.173	0.159	neg		49	0.564	0.553	pos
	52	0.109	0.111	neg		52	0.133	0.114	neg		52	0.176	0.169	neg		52	0.141	0.131	neg
	60	0.118	0.123	neg		60	0.121	0.118	neg		60	0.114	0.107	neg		60	0.135	0.139	neg
	62	0.101	0.098	neg		62	0.126	0.15	neg		62	0.184	0.199	neg		62	0.131	0.136	neg
	69	0.102	0.105	neg		69	0.108	0.124	neg		69	0.146	0.153	neg		69	0.144	0.141	neg
	76	0.579	0.528	pos		76	0.12	0.126	neg		76	0.624	0.611	pos		76	0.599	0.605	pos
